# Supplementary material for: Resolving the prevalence of somatic transposition in Drosophila
Source: eLife. 2017 Jul 25;6:e28297. doi: 10.7554/eLife.28297 (PMC5553932; doi:10.7554/eLife.28297)
Supplement: Supplementary file 1. — DOI: http://dx.doi.org/10.7554/eLife.28297.009 [file elife-28297-supp1.xlsx]

## Sheet: Sheet1
	Sample												Total
	1	2	3	4	5	6	7	8	9	10	11	12
2L:512702 - MDG3_LTR	63	52	29	16	35	34	45	25	90	139	34	18	580
2L:705847 - ROO_LTR	74	93	58	36	48	49	70	66	70	112	77	34	787
2L:2918128 - 297_LTR	56	32	38	28	36	36	34	44	18	55	39	42	458
2L:3890237 - HOBO	44	74	72	48	22	71	21	104	28	134	18	66	702
2L:4670783 - MDG3_LTR	38	51	41	23	39	41	34	33	26	10	21	39	396
2L:4870448 - ROO_LTR	73	56	36	64	38	82	69	58	76	38	16	18	624
2L:5935574 - HOBO	96	146	75	48	90	130	61	92	205	150	56	135	1284
2L:6887062 - ROO_LTR	56	53	31	33	87	54	27	84	56	31	23	81	616
2L:7420375 - JOCKEY	27	32	41	203	52	23	22	57	29	28	35	59	608
2L:7576786 - BURDOCK_LTR	69	72	50	107	45	54	22	65	52	36	49	84	705
2L:7596297 - ROO_LTR	27	43	19	70	21	21	20	30	47	30	29	27	384
2L:12229875 - HOPPER	52	55	77	64	88	26	55	13	66	149	29	49	723
2L:12906248 - 297_LTR	69	60	69	41	99	37	64	52	34	11	77	33	646
2L:13893094 - BLOOD_LTR	74	51	80	13	36	50	97	63	35	57	38	26	620
2L:14789517 - COPIA_LTR	53	68	65	65	42	20	53	33	55	27	37	38	556
2L:15213140 - ROO_LTR	98	78	86	24	92	227	62	67	79	74	62	65	1014
2L:17238229 - DOC	83	93	150	40	138	119	89	116	42	112	140	243	1365
2L:17405355 - BLASTOPIA	23	26	29	66	53	32	20	38	42	25	26	29	409
2L:17884285 - TIRANT_LTR	43	52	52	57	66	36	27	60	21	25	47	41	527
2L:17889369 - ACCORD_LTR	69	70	110	70	100	59	28	77	49	157	112	114	1015
2L:17957228 - 297_LTR	38	48	33	15	58	55	26	35	30	31	30	33	432
2L:18179801 - JOCKEY	62	76	54	31	71	73	33	60	87	107	49	73	776
2L:18570524 - HB	32	24	15	7	18	20	62	39	31	25	71	20	364
2L:19020354 - ROO_LTR	97	91	80	8	74	183	200	99	49	77	28	85	1071
2L:20542177 - ROO_LTR	66	66	71	15	65	44	35	44	81	120	50	45	702
2L:21917272 - TIRANT_LTR	65	55	67	14	82	119	48	106	71	80	49	50	806
2R:42725 - COPIA_LTR	39	54	24	17	60	26	25	35	29	78	30	47	464
2R:996401 - ROO_LTR	92	73	67	30	52	57	50	86	36	92	85	42	762
2R:2000871 - COPIA_LTR	48	55	75	7	69	67	39	64	50	30	27	31	562
2R:5125485 - COPIA_LTR	61	62	66	151	35	46	45	21	46	22	107	66	728
2R:5221843 - ROO_LTR	49	54	52	30	76	45	70	65	44	16	126	20	647
2R:5839781 - FW	170	260	232	480	129	183	237	148	272	97	157	100	2465
2R:6424534 - HB	19	53	26	6	31	7	130	51	17	82	92	10	524
2R:6859538 - ROO_LTR	127	119	134	40	95	108	111	114	126	101	166	41	1282
2R:9683345 - NOMAD_LTR	69	51.5	43	127	126	64	30	55	67	15	32	48	727.5
2R:10576525 - NOMAD_LTR	97	127	131	35	51	132	38	134	105	67	118	112	1147
2R:10767710 - STALKER2_LTR	45	57	22	67	27	45	41	49	36	76	45	37	547
2R:10829577 - JOCKEY	14	15	22	27	28	25	27	25	14	26	24	25	272
2R:10844787 - HB	22	47	13	30	26	21	52	57	26	68	116	32	510
2R:11501748 - HOBO	112	143	140	37	115	78	106	163	134	336	220	181	1765
2R:12405177 - HB	31	60	42	122	24	22	83	125	97	85	108	28	827
2R:12408921 - NOMAD_LTR	74	75	141	56	102	57	52	93	67	77	92	112	998
2R:13230046 - HOBO	69	96	86	22	122	44	53	115	125	114	68	44	958
2R:13243682 - HOBO	125	126	152	128	206	202	68	197	107	65	21	116	1513
2R:15046053 - 297_LTR	122	134	111	94	142	206	90	188	69	345	174	119	1794
2R:15461988 - ROO_LTR	93	136	155	151	122	149	88	101	150	92	99	59	1395
2R:15507058 - HB	18	22	11	26	17	7	38	38	18	8	49	14	266
2R:15535622 - ROO_LTR	82	61	47	332	120	113	97	90	37	300	44	50	1373
2R:16328594 - TABOR_LTR	88	102	85	30	45	50	66	84	76	51	74	95	846
2R:17819382 - TRANSPAC_LTR	59	81	55	23	111	142	35	94	64	80	65	27	836
2R:19320887 - ROO_LTR	90	98	90	28	54	33	104	54	108	99	44	70	872
2R:20090592 - HOPPER	36	35	33	21	31	36	21	71	36	7	59	12	398
2R:20155076 - TABOR_LTR	50	46	23	19	35	49	25	62	48	12	23	30	422
2RHet:887075 - 297_LTR	36	28	36	27	57	30	45	33	18	26	35	33	404
2RHet:1693551 - TIRANT_LTR	58	121	51	35	52	48	69	91	109	33	125	61	853
3L:299263 - BLASTOPIA_LTR	24	29	23	4	19	7	4	8	13	22	7	10	170
3L:509948 - HB	26	51	31	21	22	18	59	62	31	96	109	26	552
3L:617571 - ROO_LTR	144	92	79	36	87	229	75	116	150	122	32	69	1231
3L:1996299 - ROO_LTR	112	126	124	15	74	137	123	141	72	71	178	58	1231
3L:2795284 - HOBO	79	99	54	24	76	27	145	62	129	106	42	17	860
3L:3594259 - COPIA_LTR	51	74	50	96	116	52	40	51	67	36	30	93	756
3L:3780245 - DOC	41	50	49	40	19	64	13	35	45	24	42	65	487
3L:5657107 - HOBO	57	75	70	34	59	177	67	60	93	85	39	55	871
3L:6320208 - IDEFIX_LTR	39	39	35	15	67	28	37	29	87	31	9	46	462
3L:6515814 - ROO_LTR	77	72	53	25	45	65	116	106	54	71	36	100	820
3L:6803714 - TIRANT_LTR	147	73	151	346	72	208	51	95	119	33	64	50	1409
3L:7307819 - HOPPER	19	14	16	14	17	9	23	18	10	20	20	16	196
3L:9765510 - ROO_LTR	111	96	119	35	80	56	118	110	66	146	90	90	1117
3L:10807615 - ROO_LTR	315	237	395	197	475	816	291	180	538	374	605	731	5154
3L:10987062 - BLOOD_LTR	151	143	111	47	187	91	173	121	213	201	186	53	1677
3L:12158372 - MICROPIA_LTR	112	108	115	30	109	125	125	123	134	132	149	124	1386
3L:12224622 - ROO_LTR	88	89	49	30	43	201	115	155	90	206	35	46	1147
3L:12940149 - 297_LTR	36	35	45	49	26	84	88	64	34	57	62	74	654
3L:13286915 - MDG3_LTR	82	62	73	55	59	46	85	34	114	70	48	40	768
3L:13646173 - HOBO	119	93	228	69	124	95	242	200	365	143	146	110	1934
3L:13939910 - MAX_LTR	56	77	44	18	35	32	74	47	126	121	118	51	799
3L:14659451 - 412_LTR	57	39	25	48	32	37	79	53	23	27	106	95	621
3L:16655528 - JOCKEY	28	19	19	11	21	9	18	19	25	19	12	15	215
3L:17200783 - 297_LTR	49	58	53	40	26	46	25	48	14	75	44	48	526
3L:18484931 - TRANSPAC_LTR	63	79	88	31	73	18	30	76	79	24	46	44	651
3L:19163984 - JOCKEY	54	59	58	21	57	52	37	73	31	68	42	107	659
3L:19780122 - HB	17	27	15	9	19	26	11	36	10	33	44	8	255
3L:22349942 - HOBO	107	100	160	29	122	265	144	130	115	189	35	129	1525
3L:22488301 - HOBO	110	76	90	190	75	157	47	52	42	22	85	63	1009
3R:409800 - BLASTOPIA_LTR	13	17	8	7	15	23	4	8	11	6	31	27	170
3R:664410 - HB	52	52	48	52	32	35	102	108	53	86	43	20	683
3R:1502463 - BLOOD_LTR	150	132	66	214	129	57	37	140	38	110	124	70	1267
3R:3014075 - HB	42	38	37	14	41	46	44	79	35	5	71	39	491
3R:3195838 - 297_LTR	33	32	21	38	48	68	24	23	20	56	32	17	412
3R:3896680 - 297_LTR	45	50	32	28	48	20	59	39	74	43	64	53	555
3R:4215425 - POGO	61	48	43	11	15	14	88	54	30	73	23	57	517
3R:5030495 - HOBO	104	121	85	69	210	101	68	118	106	48	188	50	1268
3R:5865336 - HB	25	39	17	23	18	54	26	23	18	31	45	43	362
3R:6459120 - ROO_LTR	129	137	98	22	169	95	96	113	41	41	72	79	1092
3R:6841020 - ROO_LTR	86	100	187	83	39	105	132	59	96	97	64	231	1279
3R:7084920 - HOBO	92	109	103	54	143	171	84	176	145	237	170	92	1576
3R:7693426 - ROO_LTR	84	112	90	54	44	59	98	49	42	28	73	175	908
3R:7771002 - 297_LTR	62	47	40	6	28	40	26	55	52	109	81	75	621
3R:9558068 - HOPPER	21	19	43	9	17	16	50	21	21	8	19	9	253
3R:9875112 - TRANSIB2	17	25	49	29	57	22	25	21	53	20	19	52	389
3R:10785157 - ROO_LTR	82	79	104	7	108	80	79	106	37	152	40	127	1001
3R:10883999 - DIVER_LTR	27	33	29	15	33	10	43	21	16	16	30	13	286
3R:11763980 - COPIA_LTR	31	24	50	19	27	38	31	18	35	20	15	22	330
3R:12112206 - HB	26	51	26	36	31	28	30	138	59	24	72	37	558
3R:12172182 - QUASIMODO_LTR	82	81	53	81	90	51	67	92	65	128	80	64	934
3R:13097727 - HOPPER	38	52	49	49	44	55	35	62	62	52	64	25	587
3R:16220338 - ROO_LTR	92	57	37	26	39	29	126	43	39	52	35	67	642
3R:16527000 - BLOOD_LTR	62	58	104	16	54	21	46	55	29	22	22	28	517
3R:17417127 - DOC6	39	40	55	28	56	35	140	36	92	87	53	49	710
3R:17807771 - ROO_LTR	86	65	58	114	92	90	67	83	45	75	76	42	893
3R:18075872 - HOBO	53	61	68	136	72	41	47	104	77	10	103	67	839
3R:18821113 - NOMAD_LTR	66	70	49	111	74.5	47	78	69	45	33	57	57	756.5
3R:23927357 - HOPPER	93	69	87	67	57	67	144	106	126	127	42	31	1016
3R:24022594 - HOBO	71	103	103	85	126	96	144	91	83	74	74	71	1121
3R:24899225 - HB	39	43	25	27	43	37	248	63	68	116	68	22	799
3R:25283133 - HOBO	188	114	142	39	93	117	177	194	120	296	154	107	1741
3R:26492244 - ROO_LTR	78	101	55	32	45	35	167	46	59	92	66	86	862
3R:27790673 - COPIA_LTR	41	74	33	40	29	26	27	65	23	52	69	41	520
3RHet:673429 - TABOR_LTR	66	88	61	53	74	69	56	138	36	14	173	61	889
4:753150 - ROO_LTR	153	125	71	32	99	160	86	126	136	70	117	69	1244
U:141079 - IDEFIX	6	5	8	3	9	8	14	7	13	10	4	10	97
X:590426 - HOBO	123	89	133	108	91	72	65	69	65	62	63	51	991
X:780037 - ROO_LTR	122	142	81	18	63	149	56	98	141	480	111	84	1545
X:950983 - ROO_LTR	94	80	133	67	53	32	150	110	316	198	63	71	1367
X:2652418 - BLOOD_LTR	78	61	64	23	106	48	103	64	77	61	130	81	896
X:2675296 - HB	25	52	60	6	39	46	69	43	24	43	113	40	560
X:2738571 - ROO_LTR	83	83	111	15	103	128	116	103	124	198	80	120	1264
X:2990633 - BURDOCK_LTR	76	79	71	84	79	112	57	66	172	57	176	207	1236
X:3126705 - BLASTOPIA_LTR	15	28	21	15	36	23	7	10	11	14	39	33	252
X:3168277 - ROO_LTR	73	45	45	51	109	46	50	67	80	34	43	85	728
X:3192167 - HOBO	83	73	62	7	117	72	62	107	67	71	104	79	904
X:3194980 - ROO_LTR	80	79	58	26	94	83	96	62	61	100	134	70	943
X:3523103 - 297_LTR	89	71	124	24	131	68	150	60	104	124	79	120	1144
X:3959842 - HOBO	137	127	142	58	125	147	194	100	180	479	118	24	1831
X:4408238 - DIVER_LTR	49	39	42	50	27	48	19	37	49	91	101	26	578
X:4716920 - ROO_LTR	92	90	129	44	89	42	116	124	82	65	47	223	1143
X:5364806 - 297_LTR	69	63	93	27	75	67	272	75	63	217	99	74	1194
X:6387492 - ROO_LTR	123	82	83	66	156	59	84	63	81	63	173	84	1117
X:6494928 - TIRANT_LTR	108	100	138	46	56	114	84	107	107	61	179	103	1203
X:7343436 - ROO_LTR	93	71	53	77	146	70	93	37	167	50	110	65	1032
X:9829119 - 412_LTR	74	80	154	27	61	118	156	104	98	43	32	66	1013
X:10080339 - NOMAD_LTR	81	88	61	77	75	82	60	60	83	90	50	85	892
X:10670201 - 176	64	63	43	15	80	46	130	147	55	151	56.5	91	941.5
X:11115773 - POGO	80	65	42	29	173	80	22	109	102	86	67	68	923
X:11846077 - BLASTOPIA_LTR	17	23	23	21	26	21	19	9	10	10	31	42	252
X:11933626 - ROO_LTR	48	36	43	56	34	17	30	74	33	42	164	15	592
X:12070372 - COPIA_LTR	55	55	39	50	59	28	56	33	32	63	19	55	544
X:13032285 - 297_LTR	101	87	57	105	68	52	64	95	77	64	41	55	866
X:13541856 - ROO_LTR	77	66	76	97	54	39	36	73	82	83	103	63	849
X:13686954 - 297_LTR	31	25	37	21	24	35	23	21	12	43	61	33	366
X:14380147 - ROO_LTR	51	57	85	302	20	33	20	37	32	13	8	61	719
X:14760676 - ROO_LTR	97	61	40	16	41	19	107	56	116	16	48	46	663
X:15422534 - 297_LTR	52	41	62	33	79	47	195	69	66	44	41	65	794
X:17074242 - MDG3_LTR	18	30	46	70	47	50	66	35	40	33	17	23	475
X:17419040 - TRANSPAC_LTR	40	35	50	14	23	83	22	24	18	26	44	12	391
X:18938375 - BLASTOPIA_LTR	23	29	17	12	18	17	7	11	14	12	15	18	193
X:18973406 - NOMAD_LTR	77	88	52	62	67	57	31	103	95	28	72	71	803
X:19011775 - ROO_LTR	70	56	74	55	163	178	99	62	57	41	100	110	1065
X:19972463 - HOBO	108	119	122	17	195	166	97	122	95	296	157	243	1737
X:20323455 - TRANSPAC_LTR	61	68	145	15	71	37	53	93	101	101	21	43	809
X:21120199 - BLOOD_LTR	123	110	84	26	132	101	93	212	110	24	106	143	1264
X:21632261 - STALKER2_LTR	39	58	28	20	40	26	62	80	47	122	44	34	600
X:21637085 - TABOR_LTR	165	252	122	58	149	99	204	222	173	265	165	150	2024
X:22078236 - NOMAD_LTR	99	83	75	15	89	83	68	87	100	73	55	48	875
